# Supplementary material for: Rain-on-snow response to a warmer Pyrenees
Source: Copernicus journal article supplement (doi:10.5194/egusphere-2023-178), 2023-03-20
Supplement: Supplementary file 1 [file egusphere-2023-178-supplement.pdf]

1 **Supplementary material**

2

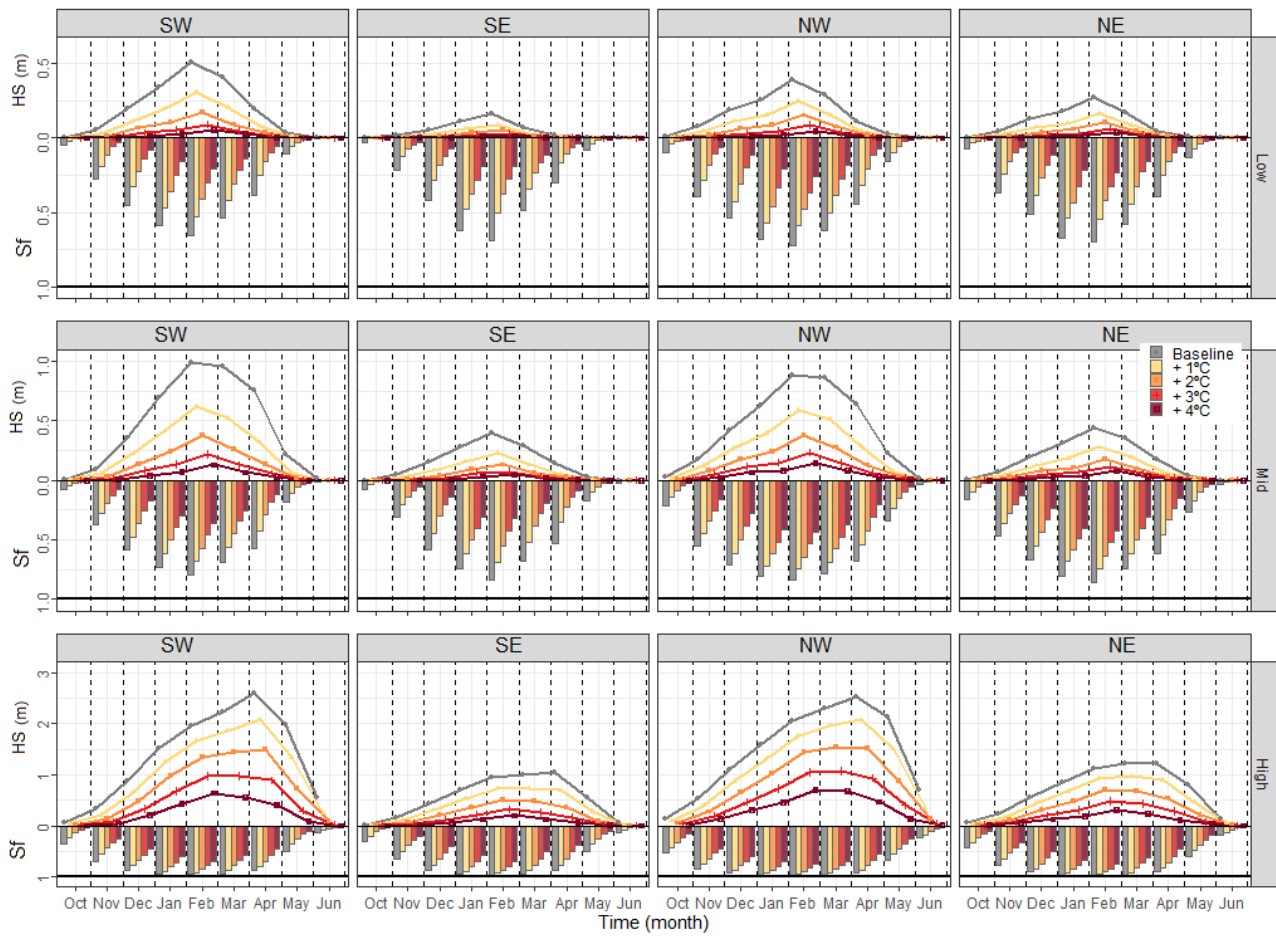

3

4

5

6

**Figure S1.** Height of snow (HS) (lines) and Snowfall fraction (Sf) monthly variation for baseline climate scenario and different increments of temperature (colors) grouped by elevation (rows) and sectors (columns).

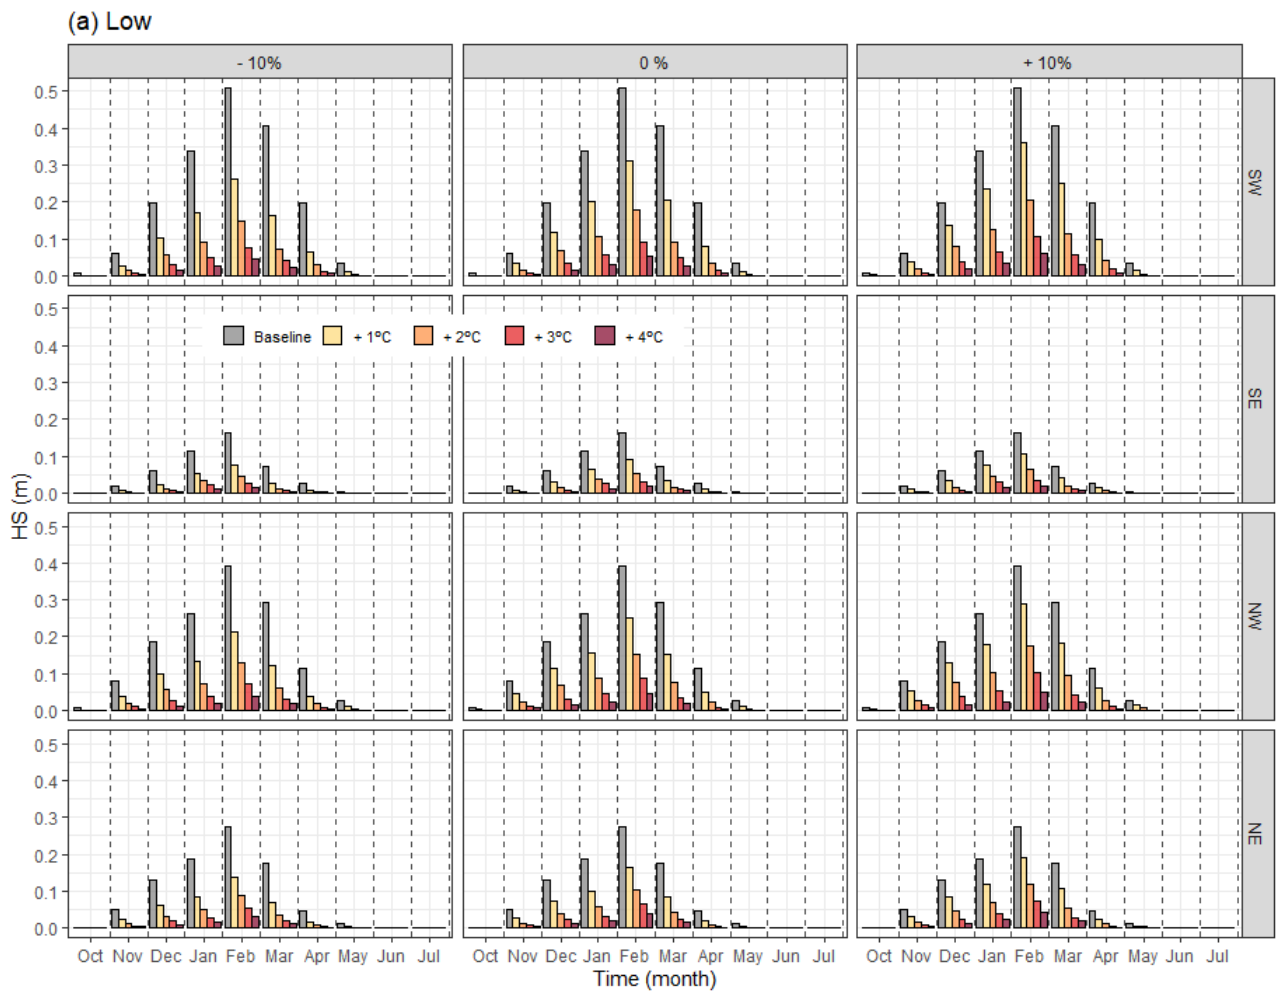

7  
 8 **Figure S2.** Low elevation height of snow (HS) (bars) monthly variation, for baseline climate and different  
 9 increments of temperature (colors), grouped by elevation (rows) and sectors (columns).

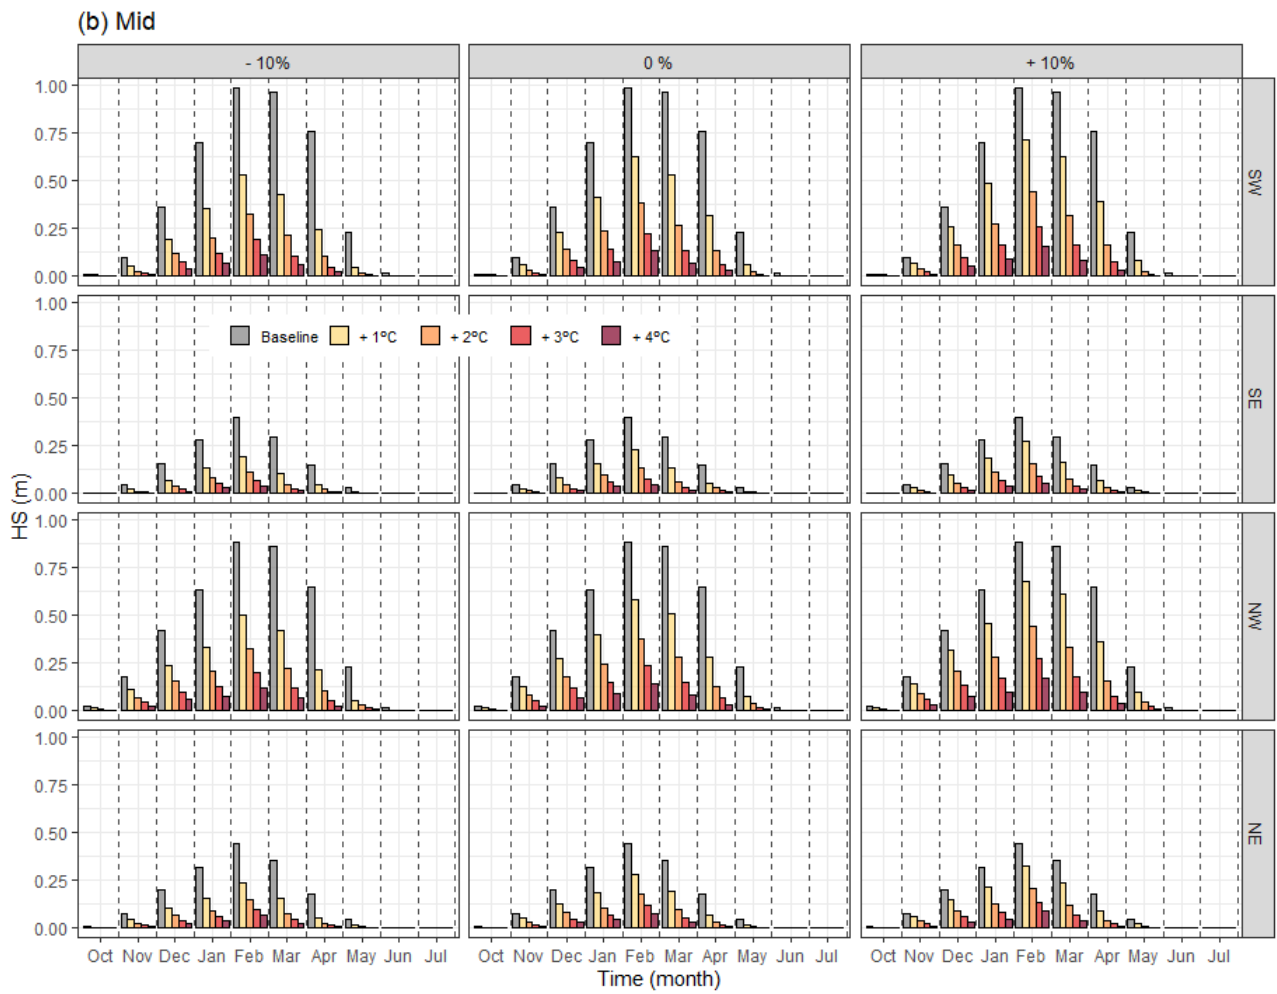

10  
 11 **Figure S3.** Mid elevation height of snow (HS) (bars) monthly variation, for baseline climate and different  
 12 increments of temperature (colors), grouped by elevation (rows) and sectors (columns).  
 13

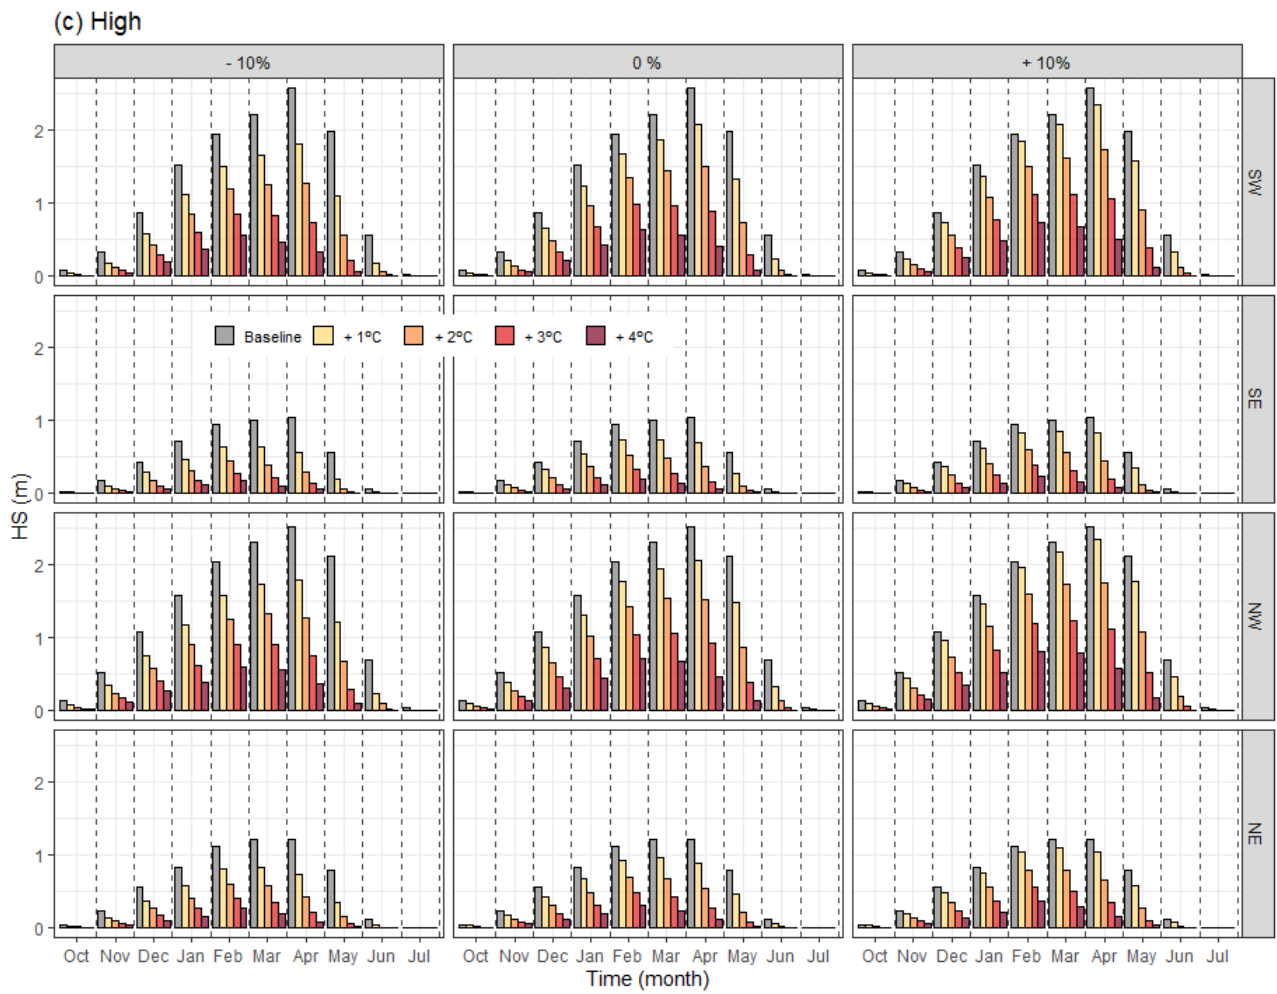

14  
 15 **Figure S4.** High elevation height of snow (HS) (bars) monthly variation, for baseline climate and different  
 16 increments of temperature (colors), grouped by elevation (rows) and sectors (columns).  
 17  
 18

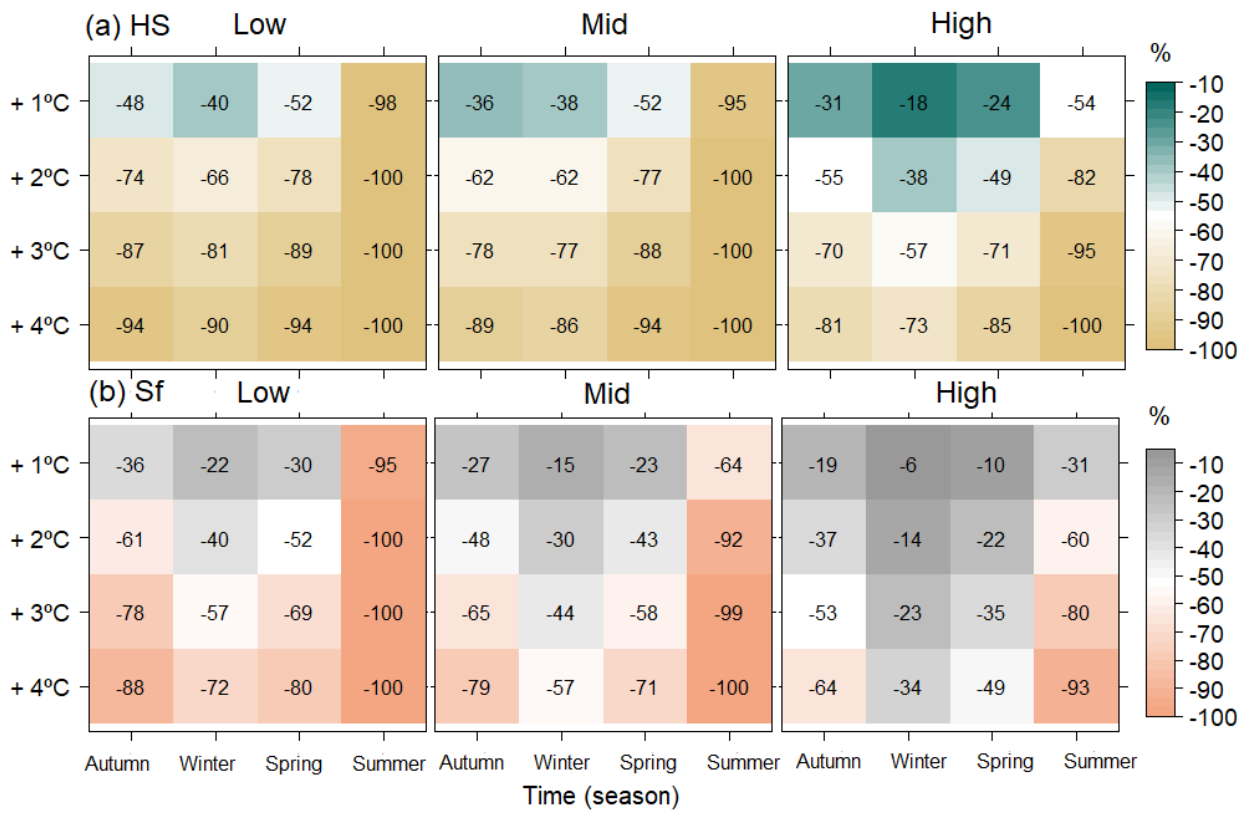

19

20 **Figure S5.** Seasonal height of snow (HS) and (b) snowfall fraction (Sf) relative changes (expressed in %)

21

with respect of the baseline climate scenario.

22

23

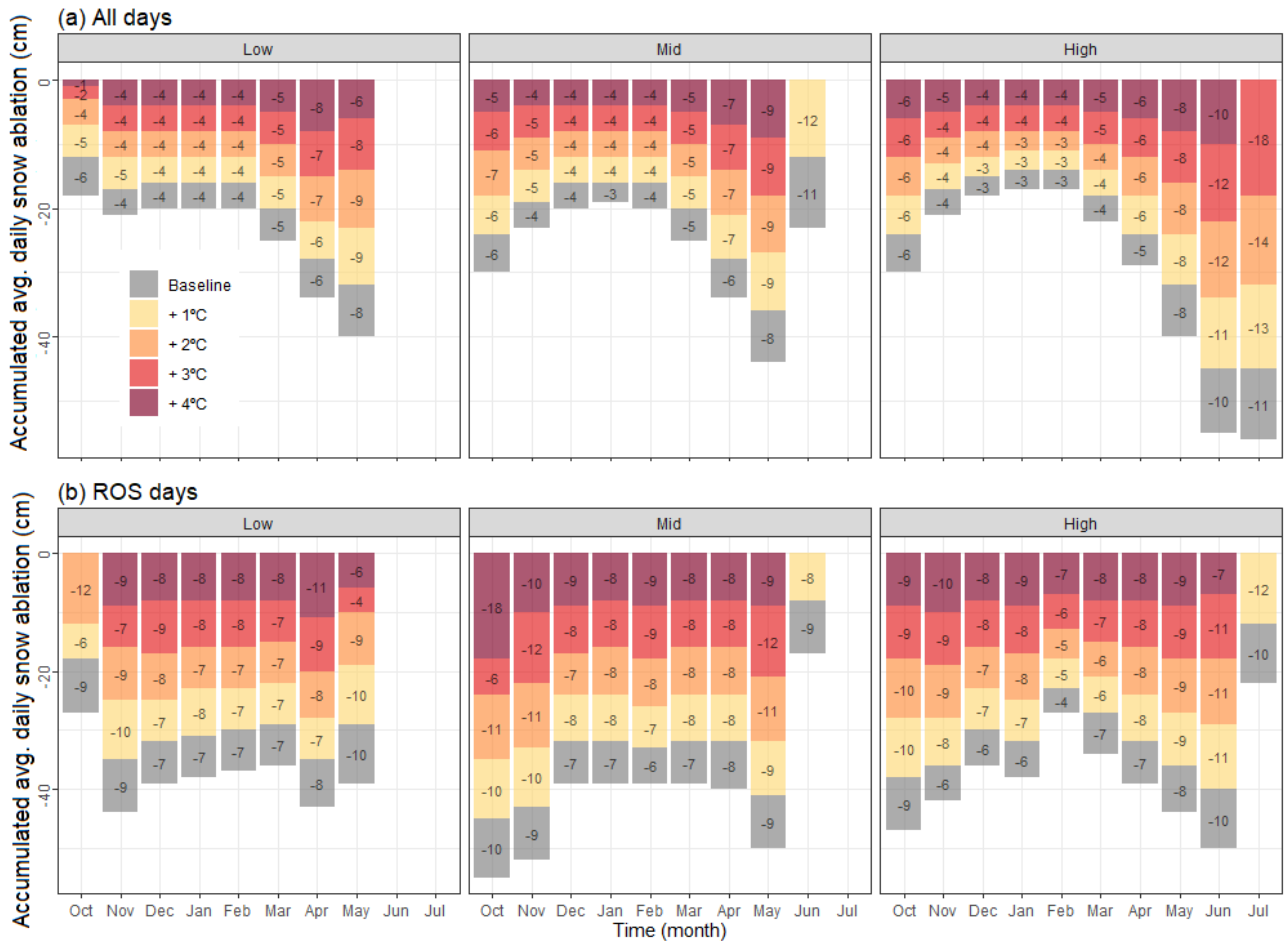

**Figure S6.** (a) All days and (b) ROS days accumulated average daily snow ablation (cm).

**Table 1.** FSM2 configuration implemented in this work.

| FSM2<br>Physics and driving data options | Configuration name                                    | Fortran compilation<br>number |
|------------------------------------------|-------------------------------------------------------|-------------------------------|
| Albedo                                   | Prognostic age function                               | 2                             |
| Snow conductivity                        | Function of density                                   | 1                             |
| Snow density                             | Function of overburden                                | 2                             |
| Turbulent exchange                       | Richardson number atmospheric<br>stability adjustment | 1                             |
| Snow hydrology                           | Gravitational drainage                                | 2                             |
| Snow cover fraction                      | Linear function of snow depth                         | 1                             |

37  
38  
39  
40

**Table S2.** ROS frequency, rainfall intensity and snow ablation average anomalies per °C over the baseline climate.

| <b>Elevation</b> | <b>Zone</b> | <b>ROS rain<br/>(mm)</b> | <b>ROSfr<br/>(days)</b> | <b>ROS albatton<br/>(cm)</b> |
|------------------|-------------|--------------------------|-------------------------|------------------------------|
| Low              | SW          | +2.5                     | 0                       | +0.5                         |
|                  | SE          | +4.7                     | 0                       | -0.2                         |
|                  | NW          | +3.8                     | 0                       | -0.2                         |
|                  | NE          | +4.7                     | 0                       | -0.3                         |
| Mid              | SW          | +2.5                     | 0                       | +0.8                         |
|                  | SE          | +5.2                     | 0                       | +0.1                         |
|                  | NW          | +3.7                     | 0                       | +0.4                         |
|                  | NE          | +5.0                     | 0                       | +0.4                         |
| High             | SW          | +5.2                     | 1                       | +0.4                         |
|                  | SE          | +6.4                     | 1                       | +0.1                         |
|                  | NW          | +5.3                     | 1                       | +0.5                         |
|                  | NE          | +6                       | 0                       | +0.7                         |

41  
42  
43
